## AMMONIA AND ACID–BASE BALANCE DURING HIGH AMMONIA EXPOSURE IN A MARINE TELEOST (*MYOXOCEPHALUS OCTODECIMSPINOSUS*)

BY JAMES B. CLAIBORNE<sup>1,2</sup> AND DAVID H. EVANS<sup>1,3</sup>

<sup>1</sup>The Mount Desert Island Biological Laboratory, Salsbury Cove, ME 04672, USA, <sup>2</sup>Department of Biology, Georgia Southern College, Statesboro, GA 30460, USA and <sup>3</sup>Department of Zoology, University of Florida, Gainesville, FL 32611, USA

Accepted 3 May 1988

### Summary

For the first time in a marine teleost (the long-horned sculpin; *Myoxocephalus octodecimspinosus*), the maintenance of blood pH,  $P_{\text{CO}_2}$ ,  $[\text{HCO}_3^-]$  and the net movements of  $\text{NH}_4^+$ ,  $\text{HCO}_3^-$  and  $\text{H}^+$  between the fish and the water have been studied during exposure to ammonia stress induced either by infusion ( $\text{NH}_4\text{Cl}$  or  $\text{NH}_4\text{HCO}_3$ ;  $5 \text{ mmol kg}^{-1}$ ) or by external application ( $\text{NH}_4\text{Cl}$ ; approx.  $1 \text{ mmol l}^{-1}$ ).

Following  $\text{NH}_4\text{Cl}$  infusion, a rapid decrease in blood pH (0.36 units) and  $[\text{HCO}_3^-]$  ( $2.38 \text{ mmol l}^{-1}$ ) was observed, and within 1 h about 40 % of the ammonia load had been excreted to the water. Analysis of  $\text{NH}_4^+$  and  $\text{HCO}_3^-$  transfers revealed that the total ammonia ( $T_{\text{Amm}}$ ) efflux was due to a loss of  $\text{NH}_3$  and  $\text{NH}_4^+$  in approximately equal proportions when an outwardly directed  $\text{NH}_3$  diffusion gradient was established.

Infusion of  $\text{NH}_4\text{HCO}_3$  induced only small changes in plasma pH, and the rate of net  $\text{HCO}_3^-$  excretion was some 90 % higher than that of  $\text{NH}_4^+$  over 20 h. These data indicate a predominance of  $\text{NH}_3$  as the form of ammonia lost. In both infusion experiments, a presumed intracellular buffering of a majority of the ammonia load was noted.

High external  $T_{\text{Amm}}$  induced an initial uptake of  $\text{NH}_4^+$ , but after 4 h of exposure ammonia efflux resumed even though  $\text{NH}_3$  diffusion gradients were negligible. Thus, in this seawater teleost, a role for the excretion of ammonia in the form of  $\text{NH}_4^+$  is also likely.

### Introduction

Teleost fish excrete nitrogenous waste products in the form of ammonia ( $\text{NH}_3 + \text{NH}_4^+$ ). Although it is well accepted that the gills are the major site of this excretion (Smith, 1929; Evans, 1982; see review by Kormanik & Cameron, 1981; Evans & Cameron, 1986), the mechanism of ammonia transfer across the gill epithelium and the form(s) of the transferred ammonia are not as clear. In the

Key words: marine teleost, ammonia, acid–base, gill, ion transfer.

freshwater trout (*Salmo gairdneri*), ammonia loss under control conditions can be accounted for principally by simple diffusive loss of  $\text{NH}_3$  (Cameron & Heisler, 1983). It has been theorized that branchial transfers such as  $\text{NH}_4^+/\text{Na}^+$  exchange are only necessary when the animal is exposed to an abnormally high ambient [ammonia] (Cameron & Heisler, 1983). Recently, Cameron (1986) has hypothesized that ammonia excretion in the freshwater catfish (*Ictalurus punctatus*) can be maintained in the face of reversed  $\text{NH}_3$  and  $\text{NH}_4^+$  concentration gradients by activating an  $\text{NH}_4^+/\text{H}^+$  exchange system. Using the isolated perfused head preparation, roles for the ionic diffusion of  $\text{NH}_4^+$  as well as  $\text{NH}_4^+/\text{Na}^+$  exchange have also been postulated for two seawater teleosts (*Opsanus beta* and *Myoxocephalus octodecimspinosus*; Goldstein *et al.* 1982; Claiborne *et al.* 1982).

The ratio of  $\text{NH}_3$  to  $\text{NH}_4^+$  diffusion across the gills is dependent on pH,  $\text{pK}'$ , temperature and the ionic strength of both the blood and the external environment, as well as the relative gill permeabilities of  $\text{NH}_3$  and  $\text{NH}_4^+$  (Cameron & Heisler, 1983; Boutilier *et al.* 1984). Cameron (1986) has calculated that the ratio of  $\text{NH}_3$  to  $\text{NH}_4^+$  transferred may range from 32:1 to 1:9, depending on the relative permeabilities and blood/water parameters utilized. Though it is likely that diffusive loss of  $\text{NH}_3$  can account for the majority of ammonia transfer in freshwater teleosts under normal conditions, the sparse data for seawater varieties indicate a role for some of the additional pathways described above. For example, since it is generally thought that the gill ion permeability of seawater-adapted teleosts is more than 10 times that of freshwater fish (Evans, 1984), ionic diffusion of  $\text{NH}_4^+$  could be much more significant in seawater animals. To gain further insight into the relative roles of these transfers in a marine species, we monitored internal acid-base regulation and gill ammonia excretion in the long-horned sculpin (*Myoxocephalus octodecimspinosus* Mitchell) following exposure to infused ammonia loads ( $\text{NH}_4\text{Cl}$  or  $\text{NH}_4\text{HCO}_3$ ) or a reversed external ammonia gradient.

### Materials and methods

Long-horned sculpin (*Myoxocephalus octodecimspinosus*), mass =  $165.1 \pm 10.4$  g ( $N = 16$ ) (mean  $\pm$  s.e.) were caught by local fishermen in Frenchman's Bay, Maine near the Mount Desert Island Biological Laboratory. The animals were maintained in large wooden or fibreglass tanks and supplied with running sea water ( $13\text{--}15^\circ\text{C}$ ). Before use, specimens were held for 2–6 days without feeding. To facilitate blood sampling in these relatively small animals, the fish were cannulated in a manner similar to that described for the measurement of ventral aortic blood pressure (Claiborne & Evans, 1981). Each fish was anaesthetized (MS-222, 1:10 000), placed in a moist tray, and periodically ventilated with aerated sea water during the 5–10 min operative procedure. The cut tip of a 23 gauge needle, connected to a short length of heparinized, Ringer-filled cannula (PE-50) was inserted into the afferent artery of the third branchial arch and secured in place with a suture. In some animals, an additional Ringer-filled cannula (PE-50) was inserted through the skin and peritoneal musculature into the peritoneal

cavity, and secured with a suture through the skin. The animals were then placed in darkened Plexiglas boxes (1.3–2.0 l) and allowed to recover for 20–48 h. During this period, fresh running sea water was directed through the experimental chamber. Several hours prior to the start of each experimental series, the running sea water was disconnected so that control net ion and ammonia fluxes (see below) could be measured. Duplicate control blood samples were also drawn during this period.

Each blood sample (0.2–0.4 ml) was analysed for pH (I.L. model 213 or Radiometer 'gun' electrode with an Orion 701A pH meter), total  $\text{CO}_2$  concentration,  $T_{\text{CO}_2}$  (Capnicon-Con II; Cameron Instruments Inc.) and plasma total ammonia concentration ( $T_{\text{Amm}}$ ; Sigma kit no. 170-UV). Plasma  $P_{\text{CO}_2}$  and  $[\text{HCO}_3^-]$  were calculated from  $T_{\text{CO}_2}$  and pH using values for  $\text{CO}_2$  solubility and  $\text{pK}'$  derived from Boutilier *et al.* (1984). Water samples (20 ml) were collected periodically and analysed for  $T_{\text{Amm}}$  using the phenolphthorite method (Solórzano, 1969). The net titratable base was determined by volumetric titration of a portion of the sample to a pH of 3.800 or 3.700 with  $0.1 \text{ mol l}^{-1}$  HCl using a syringe micrometer burette (model SB2, Micro Metric Instrument Co.) according to the methods of Cameron & Kormanik (1982). This method was typically repeatable within  $\pm 1 \mu\text{l}$  of acid ( $<1\%$ ) in a 10 ml water sample, thus the overall resolution was approx.  $25 \mu\text{mol}$  in a 1.3 l chamber. The  $\Delta\text{HCO}_3^-$  was then calculated as the difference between the titratable base at the beginning and end of each time interval. Mucus, proteins and other buffers excreted by the animal would cause an overestimation of  $\Delta\text{HCO}_3^-$ . In some cases, seawater pH was also recorded before acid was added.

#### *Ammonia infusion series*

After all control measurements had been made, animals were infused intraperitoneally with either  $\text{NH}_4\text{Cl}$  or  $\text{NH}_4\text{HCO}_3$  ( $5 \text{ mmol kg}^{-1}$ , a 3–5 ml bolus of a  $200 \text{ mmol l}^{-1}$  stock solution infused over about 2 min). After a 5-min equilibration, time zero blood and water samples were collected, and additional samples were obtained at 1, 2, 4, 8 and 20 h post-infusion. At 4 and 8 h of the experimental period, the water within the box was flushed with sea water to limit the accumulation of external ammonia.

#### *High external ammonia series*

Following the control period, the ammonia concentration within the experimental chamber was increased to approx.  $1 \text{ mmol l}^{-1}$  by the addition of  $\text{NH}_4\text{Cl}$  (approx. 6 ml of  $200 \text{ mmol l}^{-1}$  stock). After a 6-h exposure, the high ammonia bath was replaced by normal sea water for an additional 15 h. Blood was drawn at 0.5, 1, 2, 4 and 6 h of the high external ammonia (HEA) exposure, and at 1 and 15 h of the recovery period. External bath samples were also collected during all perturbations and the water within the box was flushed at 4 h of the recovery period to maintain a relatively low external  $[T_{\text{Amm}}]$ .

### Calculations

$\Delta\text{HCO}_3^-$  and  $\Delta\text{NH}_4^+$  ( $\text{mmol kg}^{-1}$ ) were calculated for all time periods by multiplying the measured concentration of each ion by the volume of the experimental bath, and adjusting for volume changes due to sampling and the mass of the animal ( $T_{\text{Amm}}$  is effectively  $[\text{NH}_4^+]$  in sea water since the  $\text{pK}'$  of the  $\text{NH}_3/\text{NH}_4^+$  equilibrium is about 9.6; Cameron & Heisler, 1983). The total amount of  $\text{H}^+$  transferred between the sculpin and the water ( $\Delta\text{H}^+$ ) is therefore the difference between  $\Delta\text{NH}_4^+$  and  $\Delta\text{HCO}_3^-$  (for details see Claiborne & Heisler, 1984, 1986; Heisler, 1984). 'Net  $\Delta$ ' values are the differences between the experimental and control rate of transfers for each time period. Data analysis was performed on a microcomputer (Franklin 1200 or Apple IIe) and Student's *t*-test (one- or two-tailed) was applied where appropriate.

### Results

#### Control measurements

Pooled control values for acid-base parameters and ion transfers are listed in Table 1. The calculated  $\Delta\text{H}^+$  during control conditions was due to a measured  $\text{HCO}_3^-$  uptake (20 %) and a more significant  $T_{\text{Amm}}$  excretion (80 %).

#### $\text{NH}_4\text{Cl}$ infusion

As shown in Fig. 1A, intraperitoneal infusion of  $\text{NH}_4\text{Cl}$  induced an increase in plasma  $T_{\text{Amm}}$ , which rose to approx.  $5400 \mu\text{mol l}^{-1}$  immediately following the infusion and then returned to levels near control values within 8 h ( $T_{\text{Amm}}$  control,  $234 \pm 29 \mu\text{mol l}^{-1}$ ;  $T_{\text{Amm}}$  8 h post-infusion,  $314 \pm 70 \mu\text{mol l}^{-1}$ ; mean  $\pm$  S.E.,  $N = 5$ ). Fig. 1B–D depicts the concurrent changes in blood acid-base status following the ammonia infusion. Plasma pH decreased from  $7.80 \pm 0.01$  to  $7.44 \pm 0.06$  ( $P < 0.01$ ,  $N = 5$ ) and then regained control levels at hour 4. Plasma  $\text{P}_{\text{CO}_2}$  rose by

Table 1. Control values for acid-base and ion transfer parameters in the longhorned sculpin

| Plasma ( $N = 16$ )                                                         |                  |
|-----------------------------------------------------------------------------|------------------|
| pH                                                                          | $7.78 \pm 0.01$  |
| $T_{\text{CO}_2}$ ( $\text{mmol l}^{-1}$ )                                  | $5.53 \pm 0.29$  |
| $\text{P}_{\text{CO}_2}$ (mmHg)                                             | $2.02 \pm 0.09$  |
| $[\text{HCO}_3^-]$ ( $\text{mmol l}^{-1}$ )                                 | $5.42 \pm 0.29$  |
| $T_{\text{Amm}}$ ( $\text{mmol l}^{-1}$ )                                   | $0.25 \pm 0.03$  |
| Cumulative ion transfer ( $\text{mmol kg}^{-1} \text{ h}^{-1}$ ; $N = 15$ ) |                  |
| $\Delta\text{NH}_4^+$                                                       | $0.29 \pm 0.03$  |
| $\Delta\text{HCO}_3^-$                                                      | $-0.07 \pm 0.03$ |
| $\Delta\text{H}^+$                                                          | $0.35 \pm 0.03$  |

$X \pm \text{S.E.}$ , ' $\Delta$ ' ion transfer rates represent the cumulative appearance of each ion in the surrounding water.

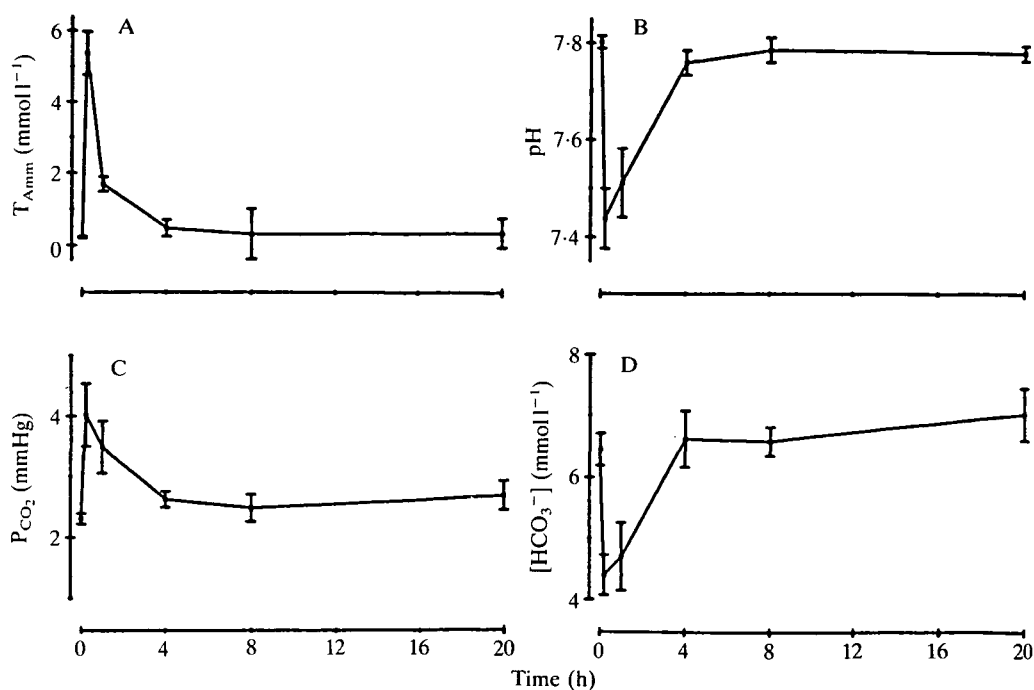

Fig. 1. Plasma total ammonia (A), pH (B),  $P_{CO_2}$  (C) and  $[HCO_3^-]$  (D) in the sculpin following  $NH_4Cl$  infusion. Time zero points represent pre-infusion control values for each parameter (mean  $\pm$  S.E.,  $N = 5$ ).

74 % from 2.3 to 4.0 mmHg (1 mmHg = 133.3 Pa) and remained significantly above pre-infusion values until hour 8, while  $[HCO_3^-]$  was depressed by  $2.0 \text{ mmol l}^{-1}$  (approx. 32 %) after the infusion but had returned to normal at the 4-h sample.

The effects of the infusion on transfers of  $NH_4^+$ ,  $HCO_3^-$  and  $H^+$  between the fish and the external bath are shown in Fig. 2A–C, respectively. In these and all following ion transfer figures, control lines represent mean  $\pm$  S.E. of the preliminary control flux period extrapolated over the length of the subsequent experimental period(s).  $NH_4Cl$  infusion induced a large increase in ammonia efflux from the animal (Fig. 2A). Over the first hour after infusion,  $T_{Amm}$  loss increased by about sevenfold from a control rate of  $0.29 \pm 0.06 \text{ mmol kg}^{-1} \text{ h}^{-1}$  to  $2.15 \pm 0.08 \text{ mmol kg}^{-1} \text{ h}^{-1}$  ( $P < 0.001$ ,  $N = 4$ ). The rate of ammonia transfer remained above the control rate until the final sampling period (hours 8–20). The 'net' loss of ammonia (the experimental rate minus the extrapolated control rate) was equal to  $3.57 \pm 0.25 \text{ mmol kg}^{-1}$  at hour 4 and totalled  $4.61 \pm 0.54 \text{ mmol kg}^{-1}$  at hour 20. Apparent  $HCO_3^-$  movements between the animal and the water (Fig. 2B) also changed following the infusion: the control uptake rate of  $0.11 \pm 0.02 \text{ mmol kg}^{-1} \text{ h}^{-1}$  was altered to a net efflux of  $1.06 \pm 0.28 \text{ mmol kg}^{-1} \text{ h}^{-1}$  during the first hour after  $NH_4Cl$  application.  $HCO_3^-$  efflux was maintained up to

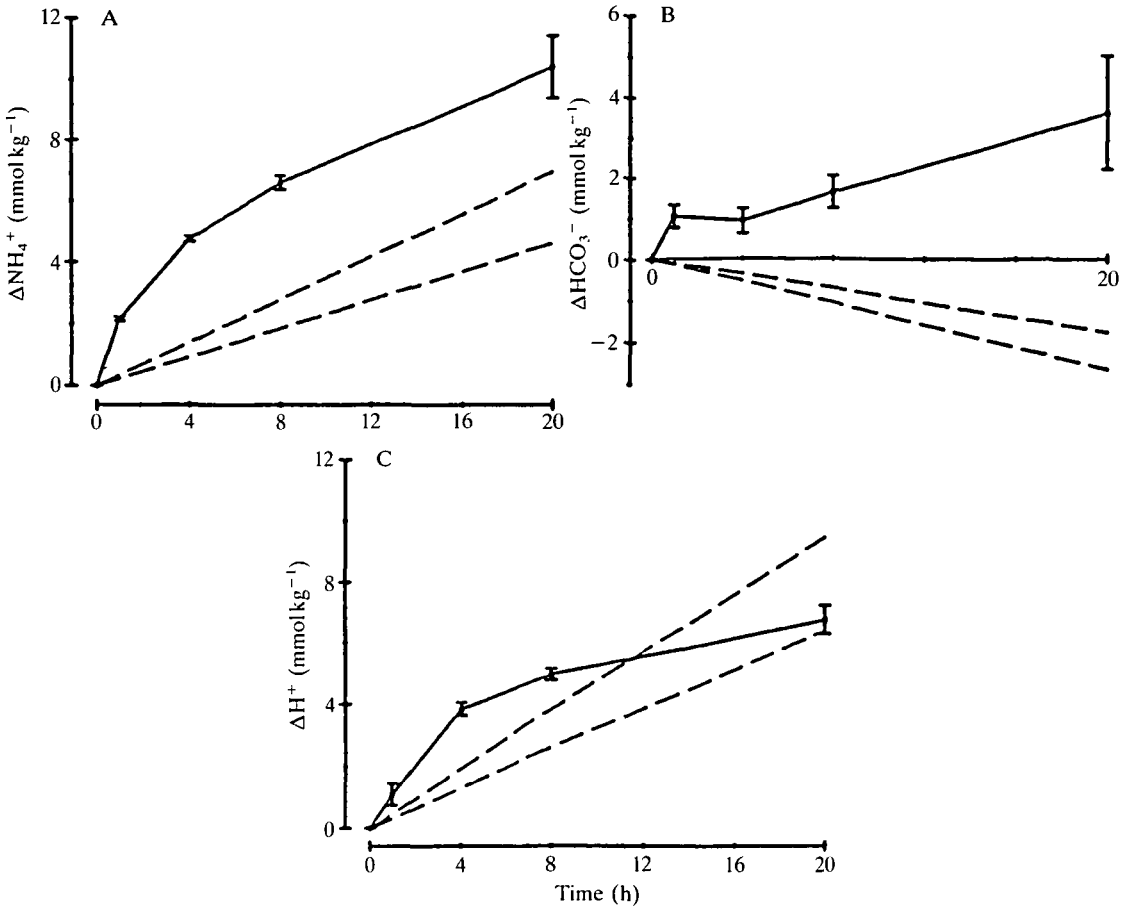

Fig. 2. Changes in cumulative  $\text{NH}_4^+$  (A),  $\text{HCO}_3^-$  (B) and  $\text{H}^+$  (C) transfers following  $\text{NH}_4\text{Cl}$  infusion (mean  $\pm$  s.e.,  $N = 4$ ). Control lines (dashed) represent the measured control rate of efflux ( $\pm$  s.e.) extended as a reference over the subsequent experimental period.

and during hour 20 ( $0.14 \pm 0.08 \text{ mmol kg}^{-1} \text{ h}^{-1}$ , hours 1–20). Net  $\text{HCO}_3^-$  loss was  $1.39 \pm 0.38 \text{ mmol kg}^{-1}$  at hour 4 and  $5.82 \pm 1.64 \text{ mmol kg}^{-1}$  after 20 h ( $P < 0.05$ ,  $N = 4$ ). The calculated  $\text{H}^+$  transfer (see Materials and methods) from fish to environment (Fig. 2C) increased significantly over the first 4 h after infusion (control,  $0.40 \pm 0.08 \text{ mmol kg}^{-1} \text{ h}^{-1}$ ; at hour 4,  $0.90 \pm 0.05 \text{ mmol kg}^{-1}$ ,  $P < 0.02$ ,  $N = 4$ ), and then decreased 60 % below the control  $\Delta\text{H}^+$  by the end of the experiment ( $0.15 \pm 0.03 \text{ mmol kg}^{-1} \text{ h}^{-1}$ ,  $P < 0.05$ ). Net  $\Delta\text{H}^+$  reached a maximum of  $2.18 \pm 0.48 \text{ mmol kg}^{-1}$  at hour 8, but was not significantly different from 0 by hour 20.

#### *$\text{NH}_4\text{HCO}_3$ infusion*

Infusion of  $\text{NH}_4\text{HCO}_3$  ( $5 \text{ mmol kg}^{-1}$ ) caused a rapid and significant increase in

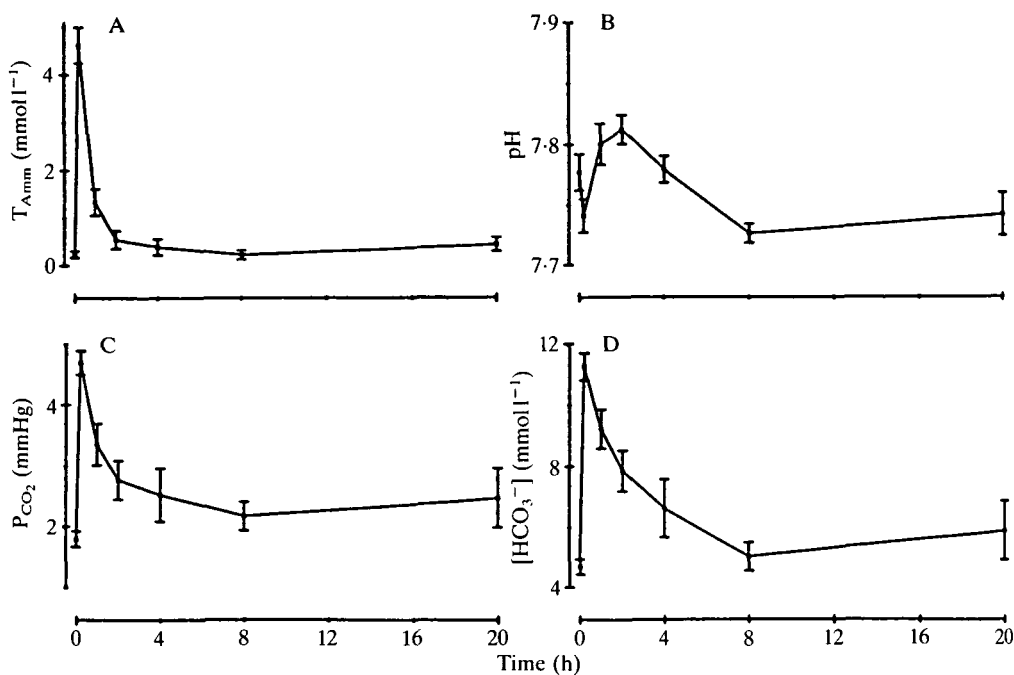

Fig. 3. Plasma total (A), pH (B),  $P_{\text{CO}_2}$  (C) and  $[\text{HCO}_3^-]$  (D) following  $\text{NH}_4\text{HCO}_3$  infusion. Time zero points represent pre-infusion control values for each parameter (mean  $\pm$  S.E.,  $N = 5$ ).

both plasma  $T_{\text{Amm}}$  and  $[\text{HCO}_3^-]$  (Fig. 3A,D). Plasma  $T_{\text{Amm}}$  increased from a control value of  $0.24 \pm 0.07$  to  $4.62 \pm 0.38 \text{ mmol l}^{-1}$  (mean  $\pm$  S.E.,  $N = 5$ ) immediately after the infusion but had returned to control levels by hour 2 after infusion. Plasma  $[\text{HCO}_3^-]$  reached a maximum of  $11.25 \pm 0.45 \text{ mmol l}^{-1}$  after  $\text{NH}_4\text{HCO}_3$  application, and then returned to values not different from the pre-infusion control of  $4.69 \pm 0.26 \text{ mmol l}^{-1}$  by the hour 4 sample. Fig. 3B shows the effect of the infusion on blood pH. The pH increased slightly but significantly at hour 2 (control,  $7.78 \pm 0.02$ ; hour 2,  $7.81 \pm 0.01$ ,  $P < 0.05$ ,  $N = 5$ ), dropped below control at hour 8 ( $7.73 \pm 0.01$ ), and then approached pre-infusion levels by the end of the experiment. Plasma  $P_{\text{CO}_2}$  (Fig. 3C) increased from  $1.80 \pm 0.13$  to  $4.69 \pm 0.20 \text{ mmHg}$  immediately after infusion. This parameter then slowly decreased to control levels by hour 4.

The rate of  $\text{NH}_4^+$  excretion (Fig. 4A) increased by 12-fold during the first hour following the  $\text{NH}_4\text{HCO}_3$  load (control,  $0.30 \pm 0.06 \text{ mmol kg}^{-1} \text{ h}^{-1}$ ; hours 0–1,  $3.55 \pm 0.43 \text{ mmol kg}^{-1} \text{ h}^{-1}$ ,  $N = 5$ ) but regained control rates by hour 2. By hour 2, the net  $\Delta\text{NH}_4^+$  was  $3.76 \text{ mmol kg}^{-1}$  and reached a maximum of  $4.42 \text{ mmol kg}^{-1}$  at hour 8.  $\Delta\text{HCO}_3^-$  also increased rapidly during the first hour post-infusion (Fig. 4B), increasing from a control rate of  $0.01 \pm 0.04 \text{ mmol kg}^{-1} \text{ h}^{-1}$  to  $3.60 \pm 0.35 \text{ mmol kg}^{-1} \text{ h}^{-1}$ . Though much reduced from the initial hour,  $\text{HCO}_3^-$  loss continued through hours 4–8 ( $0.33 \pm 0.06 \text{ mmol kg}^{-1} \text{ h}^{-1}$ ,  $P < 0.01$ ), resulting

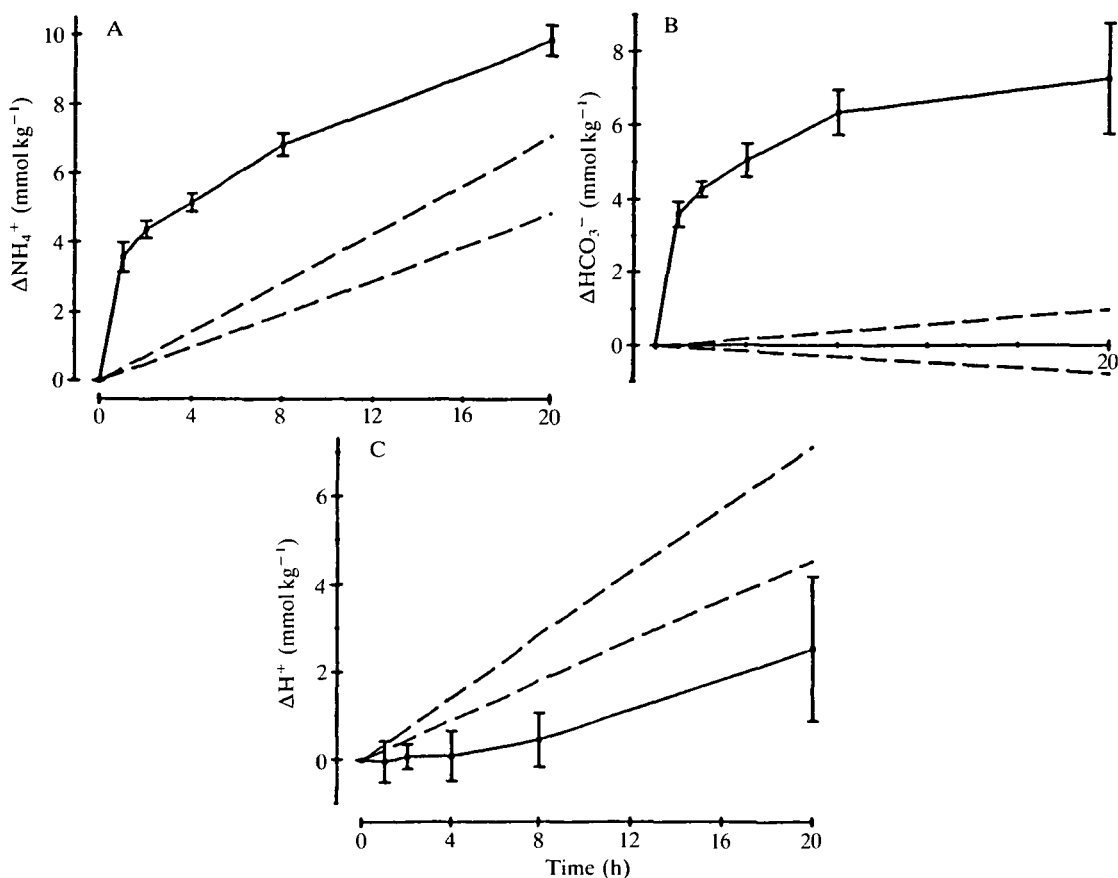

Fig. 4. Changes in cumulative  $\text{NH}_4^+$  (A),  $\text{HCO}_3^-$  (B) and  $\text{H}^+$  (C) transfers following  $\text{NH}_4\text{HCO}_3$  infusion (mean  $\pm$  s.e.,  $N=5$ ). Control lines (dashed) represent the measured control rate of efflux ( $\pm$  s.e.) extended as a reference over the subsequent experimental period.

in a net  $\Delta\text{HCO}_3^-$  of  $6.29 \text{ mmol kg}^{-1}$  at the end of this period and  $7.11 \text{ mmol kg}^{-1}$  after 20 h.  $\Delta\text{H}^+$  transfers between the animal and the water are shown in Fig. 4C. Though variable,  $\Delta\text{H}^+$  remained near zero throughout the experiment. When compared with a control excretion rate of  $0.29 \pm 0.06 \text{ mmol kg}^{-1} \text{ h}^{-1}$ , the low experimental values resulted in a significant net  $\text{H}^+$  uptake of  $3.40 \text{ mmol kg}^{-1}$  ( $P < 0.05$ ) over the 20 h post-infusion period.

#### *High external ammonia concentration*

High external ammonia concentration (HEA) induced several effects on acid-base balance and ion transfers in the sculpin ( $N=6$ ). Plasma pH and  $T_{\text{CO}_2}$  appeared to increase slightly, but did not vary significantly from the control measurements of  $7.78 \pm 0.02$  and  $5.29 \pm 0.55 \text{ mmol l}^{-1}$ , respectively (Fig. 5B,C). After 30 min in HEA, plasma  $T_{\text{Amm}}$  (Fig. 5A) had increased by nearly threefold



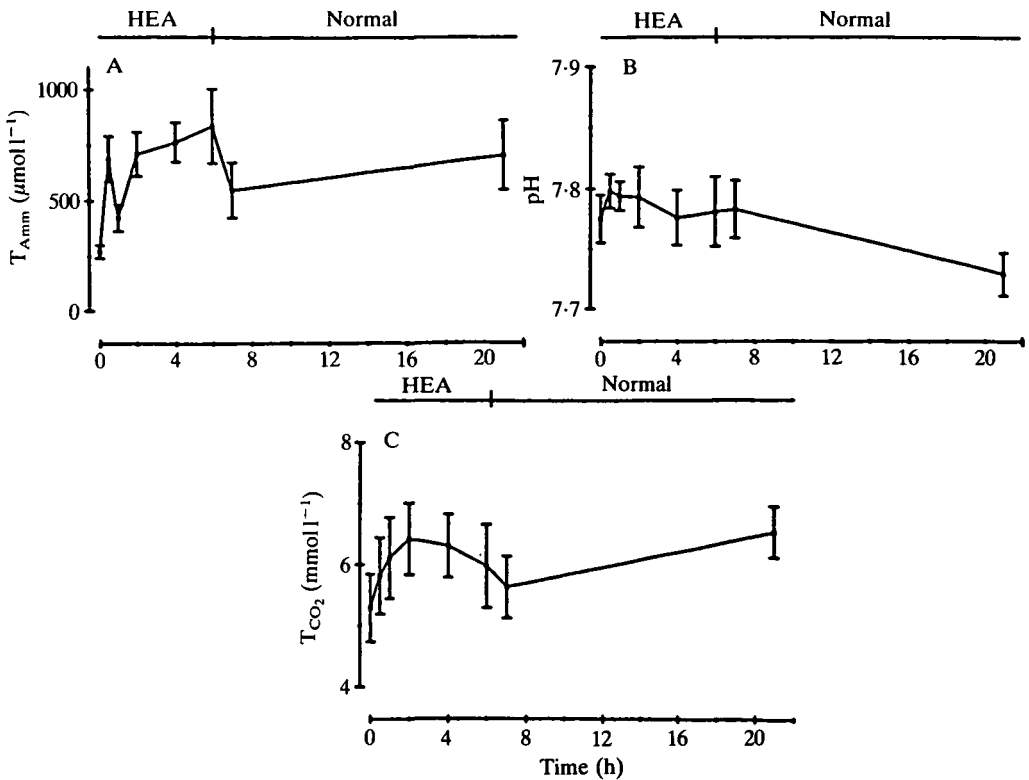

Fig. 5. Plasma total ammonia (A), pH (B) and  $T_{\text{CO}_2}$  (C) during and after exposure to high external ammonia concentration (HEA; approx.  $1 \text{ mmol l}^{-1} \text{ NH}_4\text{Cl}$ ). Time zero points represent pre-exposure control values for each parameter (mean  $\pm$  s.e.,  $N = 6$ ).

from a control of  $230 \pm 30$  to  $690 \pm 103 \mu\text{mol l}^{-1}$ .  $T_{\text{Amm}}$  reached a maximum of  $839 \pm 157 \mu\text{mol l}^{-1}$  at hour 6 (but remained below that of the external bath:  $1175 \pm 43 \mu\text{mol l}^{-1}$ ), and then decreased to  $552 \mu\text{mol l}^{-1}$  1 h after normal sea water was reinstated.

A control ammonia efflux ( $0.271 \pm 0.042 \text{ mmol kg}^{-1} \text{ h}^{-1}$ ) was reversed to an influx as a  $\Delta\text{NH}_4^+$  of  $-1.216 \pm 0.390 \text{ mmol kg}^{-1}$  was observed during the first hour of HEA (Fig. 6A). This uptake resulted in a calculated net  $\text{NH}_4^+$  gain of approx.  $2.0 \text{ mmol kg}^{-1}$  after 4 h. From hours 4 to 6,  $\Delta\text{NH}_4^+$  returned to an efflux once again ( $0.442 \pm 0.088 \text{ mmol kg}^{-1} \text{ h}^{-1}$ ,  $P < 0.01$ ). During the first 3 h of the recovery period, a large net  $\text{NH}_4^+$  loss was observed which equalled the ammonia gained in the preceding period. The rate of  $\text{NH}_4^+$  efflux remained significantly higher than the control (approx. 30%) until the end of the experiment.  $\Delta\text{HCO}_3^-$  (Fig. 6B) was reversed from a control uptake of  $0.10 \pm 0.05 \text{ mmol kg}^{-1} \text{ h}^{-1}$  to an excretion of  $0.22 \pm 0.08 \text{ mmol kg}^{-1} \text{ h}^{-1}$  at hour 2 of HEA. During the recovery period,  $\Delta\text{HCO}_3^-$  remained near zero until the last sampling interval when an efflux of  $0.24 \pm 0.06 \text{ mmol kg}^{-1} \text{ h}^{-1}$  was observed. A large but variable net  $\text{HCO}_3^-$  loss totalling  $4.66 \pm 1.14 \text{ mmol kg}^{-1}$  ( $P < 0.01$ ,  $N = 6$ ) was observed during the 15-h

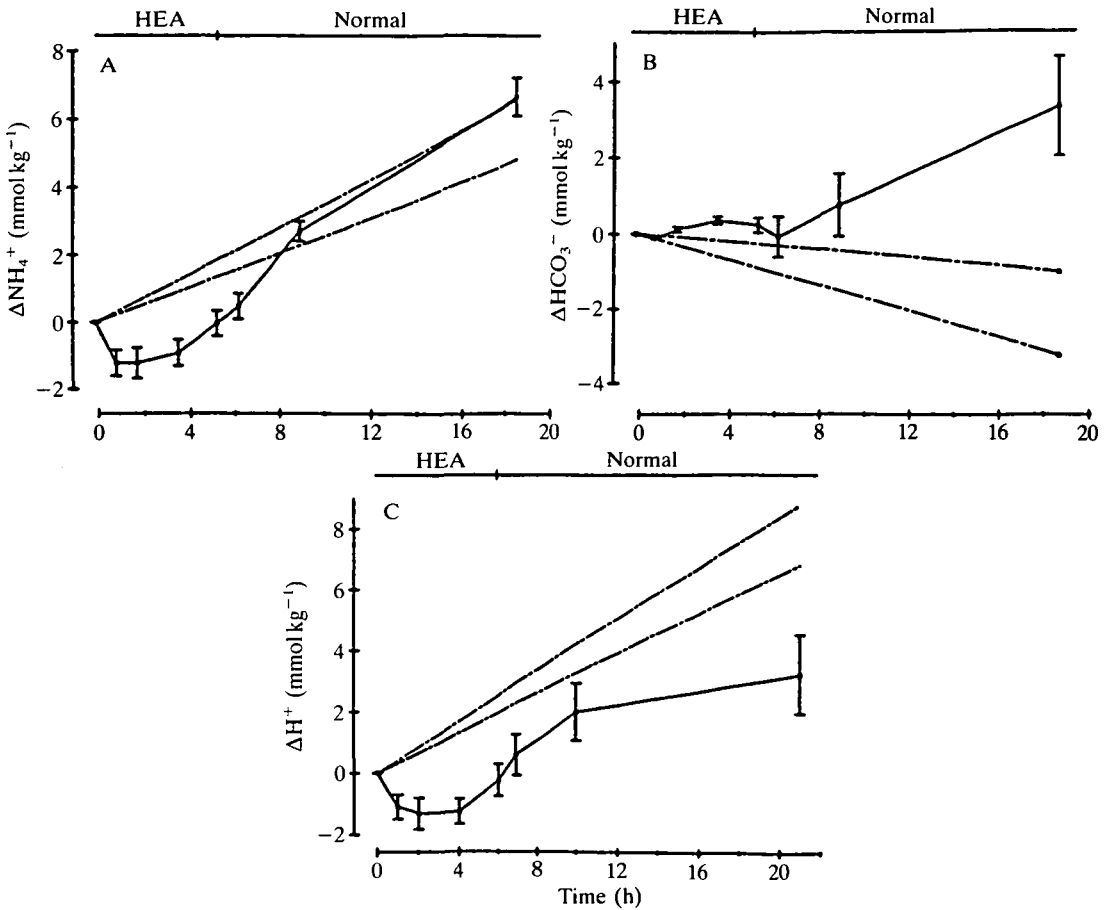

Fig. 6. Changes in cumulative  $\text{NH}_4^+$  (A),  $\text{HCO}_3^-$  (B) and  $\text{H}^+$  (C) transfers during and after exposure to high external ammonia concentration (HEA) (mean  $\pm$  s.e.,  $N=6$ ). Control lines (dashed) represent the measured control rate of efflux ( $\pm$  s.e.) extended as a reference over the subsequent experimental periods.

recovery period. The measured  $\text{NH}_4^+$  and  $\text{HCO}_3^-$  transfers resulted in a negative net  $\Delta\text{H}^+$  (a net base loss; Fig. 6C) of  $2.74 \pm 0.58 \text{ mmol kg}^{-1}$  from hours 1 to 4 of HEA.  $\Delta\text{H}^+$  then resumed rates similar to or slightly higher than the control  $\Delta\text{H}^+$  measurement ( $0.37 \pm 0.05 \text{ mmol kg}^{-1} \text{ h}^{-1}$ ) from hours 4 to 10, such that during this interval a net  $\text{H}^+$  efflux of  $1.00 \text{ mmol kg}^{-1}$  occurred. During the last sampling period of the recovery,  $\Delta\text{H}^+$  again decreased to  $0.12 \pm 0.04 \text{ mmol kg}^{-1} \text{ h}^{-1}$ .

To study the gradients driving the movement of  $\text{NH}_3$  across the gills (Fig. 7), we utilized the measured plasma and water pH and  $T_{\text{Amm}}$  values as well as appropriate solubility and  $\text{pK}'$  constants derived for trout plasma and sea water (Cameron & Heisler, 1983). Under control conditions, a positive (from fish to water)  $\text{NH}_3$  diffusion gradient of about  $60 \text{ nmHg}$  was measured. Within 1 h after exposure to the HEA, however, plasma  $P_{\text{NH}_3}$  was not significantly different from

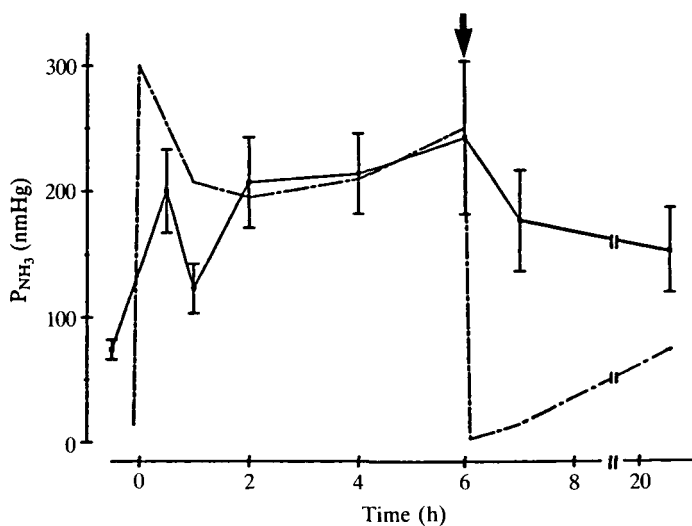

Fig. 7. Plasma and water (dashed line; mean  $\pm$  S.E.,  $N = 6$ )  $P_{NH_3}$  during and after high external ammonia concentration. Control values are those prior to time zero. The bath was flushed with normal sea water at the time shown by the arrow.

that of the surrounding sea water. When the external bath was flushed with normal sea water, plasma  $P_{NH_3}$  decreased (but remained above the control average), and a positive diffusion gradient was established once more. Sea water  $[NH_3]$  decreased during the first 2 h of HEA as ammonia entered the fish, and then significantly increased again during hours 2–6.

### Discussion

As seen in Table 1, acid–base parameters for the sculpin are similar to those for other teleosts (Heisler, 1984). Ion transfer rates also appear to be 'normal' for a seawater species (Wood *et al.* 1977; Turner *et al.* 1983). Although we have no data on the branchial *versus* renal partitioning of the observed ion movements, it is likely that a large portion of the net transfers were transbranchial (Kormanik & Cameron, 1981; Heisler, 1984). It should be noted that owing to the relatively small size and the particular vascular structure of these animals, we have found it very difficult to cannulate the dorsal aorta using the usual methods (e.g. Soivio *et al.* 1972; Claiborne & Heisler, 1986) but have utilized a method which we previously developed for this species (Claiborne & Evans, 1981). In contrast to dorsal aortic cannulation, it is likely that mixed venous blood was drawn from the animal when utilizing the present method. Possible disadvantages of our procedure may include disruption of proper water flow through the branchial cavity and ischaemia of the cannulated gill arch. However, the lack of any undue struggling or perturbations in the acid–base status of the animal during control conditions demonstrates that this procedure is acceptable for this species. In about

80 % of the cannulations, afferent blood flow did not appear to be impeded (upon visual examination of the gill arch at the termination of an experiment) and blood acid–base balance was maintained even by animals in which gill flow was blocked. In several fish returned to large holding tanks, the cannula remained patent for up to 2 weeks and periodic sampling of blood pH,  $P_{\text{CO}_2}$  and  $P_{\text{O}_2}$  indicated that these parameters remained normal over the length of the experiment (J. B. Claiborne & D. H. Evans, unpublished observations).

#### *NH<sub>4</sub>Cl infusion*

In many aspects, the present data confirm those presented by Cameron & Kormanik (1982) and Cameron & Heisler (1983) for two freshwater-adapted teleosts. We found that infusion of  $\text{NH}_4\text{Cl}$  induced a rapid decrease in plasma pH and  $[\text{HCO}_3^-]$  and an increase in  $P_{\text{CO}_2}$ . The responses are similar to those expected following a metabolic acid load or infusion (Holeton *et al.* 1983; Turner *et al.* 1983; Cameron & Kormanik, 1982). The above authors ascribe these effects to the rapid loss of the infused ammonia as  $\text{NH}_3$  (into the water), with a more gradual equimolar excretion or intracellular buffering of the remaining  $\text{H}^+$ . An alternative explanation for the observed extracellular acidosis could be that the infused ammonia enters metabolic pathways and is thus buffered intracellularly as  $\text{NH}_3$  (for example with glutamate; L. Goldstein, personal communication) thus again liberating equimolar amounts of  $\text{H}^+$ . The  $\text{NH}_3$  may then be slowly shuttled back into the blood where it could be extruded along with the remaining protons (as  $\text{NH}_3 + \text{H}^+$  and/or  $\text{NH}_4^+$ ).

By examining the transfers of  $\text{NH}_4^+$ ,  $\text{HCO}_3^-$  and net  $\text{H}^+$  between the fish and the water, one can attempt to quantify the relative amounts of acid–base exchanges occurring across the gills following the ammonium infusion. As seen in Fig. 2, during the first hour after infusion, a net  $\text{NH}_4^+$  excretion of  $2.1 \text{ mmol kg}^{-1}$  in combination with a  $\Delta\text{HCO}_3^-$  of approx.  $1.0 \text{ mmol kg}^{-1}$  resulted in a net  $\text{H}^+$  loss of approx.  $1.1 \text{ mmol kg}^{-1}$ . Since any  $\text{NH}_3$  leaving the animal would create an equivalent amount of  $\text{HCO}_3^-$  in the water (the majority of  $\text{NH}_3$  lost to the sea water would be immediately protonated to  $\text{NH}_4^+$ ), it appears that, during this first hour, about 48 % of the total ammonia excretion was due to the loss of  $\text{NH}_3$ , and the remainder was *via* the combined loss of  $\text{NH}_3$  and  $\text{H}^+$ , the direct transfer of  $\text{NH}_4^+$  along with  $\text{Cl}^-$ , or the exchange of  $\text{NH}_4^+$  with external  $\text{Na}^+$  (see review by Evans & Cameron, 1986). Unfortunately, the transfer of  $\text{NH}_3 + \text{H}^+$  is indistinguishable from the movement of  $\text{NH}_4^+$  using present analytical methods. When the control rate of ammonia excretion is taken into account, the calculated net  $\text{NH}_4^+$  efflux is  $1.9 \text{ mmol kg}^{-1}$ . Thus, about 40 % of the infused ammonia had appeared in the water within 1 h. At the same time, a net  $\text{H}^+$  loss of  $0.7 \text{ mmol kg}^{-1}$  amounted to about 15 % of the infused load, again an indication of the direct loss of  $\text{NH}_3$ .

Using  $1.0 \text{ mmol kg}^{-1}$  as an estimate of the  $\text{NH}_3$  leaving the fish during the first hour after infusion (and thus the proton load remaining within the animal), an extracellular space estimate of 20 % (Cameron, 1980) and a blood buffer value of

-12 mequiv pH unit<sup>-1</sup> (Cameron & Heisler, 1983), if all the proton load were to remain in the extracellular fluids during this period, the plasma pH would have decreased by approximately 0.4 units; in fact, the pH had increased slightly after 1 h (Fig. 1B). This is clear, if indirect, evidence that the H<sup>+</sup> liberated from the NH<sub>4</sub>Cl was removed from the extracellular space and probably buffered intracellularly. As calculated by Heisler (1980) and Cameron & Kormanik (1982), the relatively large volume and buffering capacity of the intracellular space could absorb this excess H<sup>+</sup> without a drastic effect on intracellular pH.

From hours 1 to 4, a shift in the mode of ammonia and H<sup>+</sup> transfer is apparent. During this period, the net H<sup>+</sup> loss was driven almost completely by the NH<sub>4</sub><sup>+</sup> (or NH<sub>3</sub> + H<sup>+</sup>) efflux (the net  $\Delta\text{HCO}_3^-$  was near 0). 1.5 mmol kg<sup>-1</sup> (cumulative total, 40 %) of H<sup>+</sup> was cleared from the animal during this period. Paralleling these transfers was a recovery of plasma pH that was complete by hour 4.

Over the subsequent 16 h of the experiment, a cumulative NH<sub>4</sub><sup>+</sup> loss of 5.7 mmol kg<sup>-1</sup> and a  $\Delta\text{HCO}_3^-$  of 2.8 mmol kg<sup>-1</sup> indicate that about 47 % of the total ammonia excretion was again due to NH<sub>3</sub> while the remainder must have resulted from the transfer of NH<sub>4</sub><sup>+</sup> (or NH<sub>3</sub> + H<sup>+</sup>). The net NH<sub>4</sub><sup>+</sup> lost after 20 h was  $4.61 \pm 0.54$  mmol kg<sup>-1</sup>, or 92 % of the infused load. In contrast, from hours 4 to 20, net  $\Delta\text{H}^+$  became negative. Owing to this reversal, the total H<sup>+</sup> excreted over the entire 20 h was not different from that expected from control fish. In other words, the proton load induced by the infusion of NH<sub>4</sub>Cl and any non-ionic elimination of NH<sub>3</sub> had not been excreted by the animal after 20 h. Paradoxically, 40 % of the infusion had been lost by hour 4, but the animals developed a net uptake of H<sup>+</sup> (or an efflux of HCO<sub>3</sub><sup>-</sup>) during the next 16 h (Fig. 2C). Cameron & Kormanik (1982) found that after an infusion of NH<sub>4</sub>Cl the freshwater catfish (*Ictalurus punctatus*) excreted only a portion of the total ammonia (65 %) and H<sup>+</sup> (48 %) load. They theorized that the remainder of these components was either excreted slowly by the animal or retained in the intracellular compartment. The plasma pH of the sculpin had returned to normal within 4 h post-infusion and remained at this level for the next 16 h. Since plasma pH could be maintained even while the animal was not excreting the infused H<sup>+</sup>, it is again likely that the net H<sup>+</sup> gain was sequestered intracellularly. Though we have no data past hour 20, it is possible that the sculpin also excrete the sequestered H<sup>+</sup> load over the next few days. If the reversal in H<sup>+</sup> transfer is a maladaptive response, perhaps it is due to the artificially high concentrations of internal ammonia to which the animals were exposed following the infusion (about 23 times control). It remains to be seen whether an ammonia 'overload' alters the metabolic homeostasis of amino acid catabolism and synthesis of NH<sub>3</sub> and H<sup>+</sup> within the gill epithelium (Goldstein *et al.* 1964; Cameron & Heisler, 1983), and thereby indirectly affects intra- and extracellular H<sup>+</sup> and HCO<sub>3</sub><sup>-</sup> balance.

Although the modes of ammonia excretion in these fish appear to include the transfer of both NH<sub>4</sub><sup>+</sup> (or NH<sub>3</sub> + H<sup>+</sup>) and NH<sub>3</sub>, the data indicate that the ratio of each of these components in the total ammonia lost may vary at different stages of the experiment. During the first hour post-infusion, and again after hour 4, about

50 % of ammonia excretion was due to the excretion of  $\text{NH}_3$ , whereas from hours 1 to 4,  $\text{NH}_4^+$  or  $\text{NH}_3 + \text{H}^+$  transfer accounted for the entire ammonia lost. The question arises as to why these animals would switch from a passive non-ionic diffusion of  $\text{NH}_3$  to a presumably carrier-mediated transport of  $\text{NH}_4^+$  or  $\text{H}^+$  during hours 1–4. A probable answer becomes clear when one considers the ammonia gradients between the fish and the water through the course of the experiment. The observed alterations in the mode of ammonia transfer may have been due to a build-up of external ammonia in the environmental water following the infusion. The bath was flushed with fresh sea water at hour 4 (and again at hour 8; see Materials and methods), but by hour 4 the external  $P_{\text{NH}_3}$  was approx. 95 nmHg and the plasma  $P_{\text{NH}_3}$  was approx. 125 nmHg [calculated using solubility and  $\text{pK}'$  derived for sea water and trout plasma by Cameron & Heisler, 1983, observed plasma pH values (this study), and a mean water pH of 7.5, J. B. Claiborne & D. H. Evans, unpublished]. Thus, only a small net  $P_{\text{NH}_3}$  gradient (30 nmHg) was available to drive diffusion of  $\text{NH}_3$  during this period. In contrast, the gradient for  $\text{NH}_3$  efflux immediately following the  $\text{NH}_4\text{Cl}$  infusion was approx. 640 nmHg (20 versus 660 nmHg, water and plasma, respectively). Subsequent to the seawater change at hour 4, the  $P_{\text{NH}_3}$  of the water decreased to approx. 9 nmHg, thus creating a larger gradient for the outward diffusion of  $\text{NH}_3$  once more. That ammonia excretion could continue (Fig. 2A) when the  $P_{\text{NH}_3}$  gradient was relatively small, is an indication that these animals can utilize some active form of  $\text{NH}_4^+$  excretion when necessary. This finding led us to perform a separate series of experiments designed to assess further these transfers during high external ammonia exposure (see below).

#### *$\text{NH}_4\text{HCO}_3$ infusion*

The infusion of  $\text{NH}_4\text{HCO}_3$  is different from that of  $\text{NH}_4\text{Cl}$  (described above), in that  $\text{NH}_4\text{HCO}_3$  dissociation will result in the fish receiving equal amounts of an acid ( $\text{NH}_4^+$ ) and a base ( $\text{HCO}_3^-$ ). If the animal were to lose the infused ammonia as  $\text{NH}_4^+$ , any  $\text{HCO}_3^-$  not concurrently excreted should cause an internal base excess and concomitant pH increase. In contrast, if ammonia were transferred as  $\text{NH}_3$ , the remaining  $\text{H}^+$  would be buffered by the additional  $\text{HCO}_3^-$  (leading to an increase in plasma  $P_{\text{CO}_2}$  due to the dehydration of  $\text{HCO}_3^-$  to  $\text{CO}_2$  and  $\text{H}_2\text{O}$ ), and no pH change should be apparent. The present data indicate that both processes may have occurred during the hours subsequent to the infusion. In the first 2 h,  $\text{NH}_4^+$  and  $\text{HCO}_3^-$  excretion rates were similar ( $\Delta\text{H}^+ \approx 0$ ). Plasma  $T_{\text{Amm}}$  rapidly increased and then returned to control levels. At the same time, extracellular  $[\text{HCO}_3^-]$  was elevated but subsequently did not decrease to the same extent. Both plasma  $P_{\text{CO}_2}$  and pH increased significantly during this interval. Since plasma  $[\text{HCO}_3^-]$  remained elevated and blood pH increased, one could hypothesize that a portion of the excreted ammonia was lost in the form of  $\text{NH}_4^+$  without a parallel loss of  $\text{HCO}_3^-$ . Given the maximum observed pH increase (0.071 units; the difference between hours 0 and 2), an estimate for extracellular space of 20 %, and a blood buffer value of  $-12 \text{ mequiv pH}^{-1}$  (see previous section), only about 4 % of

the observed  $\text{NH}_4^+$  transfer could have been voided in this manner. Thus, the pH changes following the infusion were much less than one would expect if a significant proportion of the ammonia excretion were due to  $\text{NH}_4^+$  transport without the concurrent loss of  $\text{HCO}_3^-$ . Likewise, had all ammonia lost during the first few minutes post-infusion been due to  $\text{NH}_4^+$  transfer, the resulting plasma  $[\text{HCO}_3^-]$  of  $11.25 \text{ mmol l}^{-1}$  (and no change in  $\text{P}_{\text{CO}_2}$ ) would have led to a metabolic alkalosis with serosal pH values of approx. 8.12 (calculated from using solubility and  $\text{pK}'$  values derived from Boutilier *et al.* 1984). That the pH did not increase during the initial period, concurrent with the observed rapid elevation in plasma  $\text{P}_{\text{CO}_2}$ , is evidence for a diffusive  $\text{NH}_3$  transfer component.

As shown in the previous section, extracellular–intracellular transfers of the infused loads can play a role in the regulation of the observed exchanges. For example, the sum of the net excreted ammonia and that measured in the extracellular compartment after 1 h can only account for approx. 3.5 mmol (70 %) of the infused load. The remainder was presumably sequestered intracellularly. In contrast, beginning at hour 1, net  $\text{HCO}_3^-$  transferred out of the animal plus the extracellular  $\text{HCO}_3^-$  increase was equal to or greater than the amount infused. Upon infusion of equal amounts of acid and base, the net  $\text{H}^+$  lost by the fish might be expected to remain near 0 (no different from control rates). Interestingly, net  $\Delta\text{H}^+$  for the sculpin did not remain constant and, over the 20-h experiment, these animals exhibited a net  $\text{H}^+$  gain (or a net  $\text{HCO}_3^-$  loss) of  $3.6 \text{ mmol kg}^{-1}$  due mainly to a 42 % ‘overshoot’ in  $\text{HCO}_3^-$  loss (approx.  $7.1 \text{ mmol kg}^{-1}$  over the 20-h experiment). The maintenance of the pre-infusion plasma  $[\text{HCO}_3^-]$  *vis-à-vis* the net efflux of  $\text{HCO}_3^-$  is evidence for a contribution of the intracellular  $\text{HCO}_3^-$  pool to the observed net loss of this ion, and could again be due to the ‘ammonia stress’ imposed on the animal (see above).

#### *High external ammonia concentration*

When exposed to high external ammonia concentration (HEA) the plasma  $\text{T}_{\text{Amm}}$  of the sculpin increased threefold during the first 30 min of the exposure. This increase was due to a large net ammonia influx (approx  $2.0 \text{ mmol kg}^{-1}$ ; Fig. 6A) which lasted for the first 4 h. Importantly, alterations in the rate of ammonia transfer accounted for about 90 % of the calculated  $\Delta\text{H}^+$  during the first few hours of HEA. This result, in combination with the negligible effects of the HEA on plasma pH, may suggest that a large portion of the  $\text{T}_{\text{Amm}}$  which entered the animal was in the form of  $\text{NH}_4^+$ . Had  $\text{NH}_3$  been the predominant form taken up by the animal, a reduction in  $\Delta\text{HCO}_3^-$  and a blood alkalosis might be predicted (Cameron & Heisler, 1983; Cameron, 1986). These results, though in contrast to those described for freshwater trout and catfish, are not unexpected since the ionic permeability of the gills in marine species is thought to be relatively high (Evans, 1979), and these animals are capable of a more rapid recovery from acid–base disturbances (Toews *et al.* 1983; Claiborne & Heisler, 1984, 1986). Indeed, evidence for a role of ionic  $\text{NH}_4^+$  diffusion across the gills of the sculpin has been described previously (Goldstein *et al.* 1982). Interestingly,  $\text{NH}_4^+$  transfer changed

to an efflux from hours 4 to 6 of HEA and remained so for the entire recovery period such that net  $\Delta\text{NH}_4^+$  returned to zero. Stated another way, the net ammonia gained during the first part of the HEA exposure was subsequently excreted again. Furthermore, the initial loss of ammonia was accomplished by the fish when the external  $[\text{NH}_4\text{Cl}]$  was still elevated to approx.  $1.2 \text{ mmol l}^{-1}$ . As can be seen in Fig. 7, this excretion was also measured at a time when the diffusion gradient for  $\text{NH}_3$  between the fish and the water was nil. That a  $\text{NH}_4^+$  efflux could be maintained during a period when  $\text{NH}_3$  gradients between the animal and the water were effectively zero and  $\text{NH}_4^+$  gradients were negative (from the water into the animal) suggests that the sculpin is capable of actively extruding ammonia (perhaps *via*  $\text{Na}^+/\text{NH}_4^+$  or  $\text{NH}_4^+/\text{H}^+$  exchange; see review by Evans & Cameron, 1986; Cameron, 1986) under these extreme conditions. However, sculpin (unlike the freshwater trout and catfish; Cameron & Heisler, 1983; Cameron, 1986, respectively) cannot maintain plasma  $\text{P}_{\text{NH}_3}$  levels below that of an elevated external environment. When the high-ammonia water was flushed with normal sea water, plasma  $\text{T}_{\text{Amm}}$  remained above the control level until hour 20. It is likely that ammonia taken up during the HEA was shuttled back out of intracellular compartments and, finally, into the water.

In conclusion, the maintenance of acid-base balance and the movements of  $\text{NH}_4^+$  and  $\text{HCO}_3^-$  have been studied in a marine teleost during exposure to either infused or externally induced ammonia stress. The present results demonstrate that the sculpin is permeable to both  $\text{NH}_3$  and  $\text{NH}_4^+$ . Blood and ion-exchange data following ammonia infusion indicate that at least 50 % of the infused load is excreted in the form of  $\text{NH}_3$ . In contrast, when external  $\text{T}_{\text{Amm}}$  levels are elevated, ammonia appears to enter the animal as  $\text{NH}_4^+$ . A role for the excretion of ammonia in the form of  $\text{NH}_4^+$  is also apparent (either *via* ionic diffusion of  $\text{NH}_4^+$  or perhaps by some form of cation exchange), especially when outwardly directed diffusive  $\text{NH}_3$  gradients are negligible. After each infusion, a majority of the ammonia and associated acid or base load is sequestered intracellularly and then presumably released to the extracellular fluid over time.

The authors would like to thank Drs James Cameron, Leon Goldstein and Gregg Kormanik as well as Ms Julie Walton for helpful discussions concerning this work. This research was supported by NSF DCM 86-02905 and Georgia Southern College Faculty Research Grants to JBC, and NSF PCM 83-02621 to DHE.

### References

- BOUTILIER, R. G., HEMING, T. A. & IWAMA, G. A. (1984). Physiochemical parameters for use in fish respiratory physiology. In *Fish Physiology*, vol. X (ed. W. S. Hoar & D. J. Randall), pp. 39–63. New York: Academic Press.
- CAMERON, J. N. (1980). Body fluid pools, kidney function, and acid-base regulation in fresh water catfish *Ictalurus punctatus*. *J. exp. Biol.* **86**, 171–185.
- CAMERON, J. N. (1986). Responses to reversed  $\text{NH}_3$  and  $\text{NH}_4^+$  gradients in a teleost (*Ictalurus punctatus*), an elasmobranch (*Raja erinacea*), and a crustacean (*Callinectes sapidus*): Evidence for  $\text{NH}_4^+/\text{H}^+$  exchange in the teleost and the elasmobranch. *J. exp. Zool.* **239**, 183–195.



- CAMERON, J. N. & HEISLER, N. (1983). Studies of ammonia in the rainbow trout: physico-chemical parameters, acid-base behaviour and respiratory clearance. *J. exp. Biol.* **105**, 107-125.
- CAMERON, J. N. & KORMANIK, G. N. (1982). The acid-base responses of gills and kidney to infused acid and base loads in the channel catfish, *Ictalurus punctatus*. *J. exp. Biol.* **99**, 143-160.
- CLAIBORNE, J. B. & EVANS, D. H. (1981). The effect of perfusion and irrigation flow rate variations on NaCl efflux from the isolated, perfused head of the marine teleost, *Myoxocephalus octodecimspinosus*. *Mar. Biol. Letts* **2**, 123-130.
- CLAIBORNE, J. B., EVANS, D. H. & GOLDSTEIN, L. (1982). Fish branchial  $\text{Na}^+/\text{NH}_4^+$  exchange is via basolateral  $\text{Na}^+/\text{K}^+$  activated ATPase. *J. exp. Biol.* **96**, 431-434.
- CLAIBORNE, J. B. & HEISLER, N. (1984). Acid-base regulation and ion transfers in the carp (*Cyprinus carpio*) during and after exposure to environmental hypercapnia. *J. exp. Biol.* **108**, 25-43.
- CLAIBORNE, J. B. & HEISLER, N. (1986). Acid-base regulation and ion transfers in the carp (*Cyprinus carpio*): pH compensation during graded long- and short-term environmental hypercapnia, and the effect of bicarbonate infusion. *J. exp. Biol.* **126**, 41-61.
- EVANS, D. H. (1979). Fish. In *Osmotic and Ionic Regulation in Animals*, vol. 1 (ed. G. M. O Maloij), pp. 305-390. London: Academic Press.
- EVANS, D. H. (1982). Mechanisms of acid extrusion by two marine fishes: the teleost, *Opsanus beta*, and the elasmobranch, *Squalus acanthias*. *J. exp. Biol.* **97**, 289-299.
- EVANS, D. H. (1984). The roles of gill permeability and transport mechanisms in euryhalinity. In *Fish Physiology*, vol. X (ed. W. S. Hoar & D. J. Randall), pp. 239-283. New York: Academic Press.
- EVANS, D. H. & CAMERON, J. N. (1986). Gill ammonia transport. *J. exp. Zool.* **239**, 17-23.
- GOLDSTEIN, L., CLAIBORNE, J. B. & EVANS, D. H. (1982). Ammonia excretion by the gills of two marine teleost fish: An important role for ionic diffusion. *J. exp. Zool.* **219**, 395-398.
- GOLDSTEIN, L., FORSTER, R. P. & FANELLI, B. M. (1964). Gill blood flow and ammonia excretion in the marine teleost, *Myoxocephalus scorpius*. *Comp. Biochem. Physiol.* **12**, 489-499.
- HEISLER, N. (1980). Regulation of the acid-base status in fish. In *Environmental Physiology of Fishes* (ed. M. A. Ali), pp. 123-162. New York: Plenum Press.
- HEISLER, N. (1984). Acid-base regulation in fishes. In *Fish Physiology*, vol. XA (ed. W. S. Hoar & D. J. Randall), pp. 315-401. New York: Academic Press.
- HOLETON, G. F., NEUMANN, P. & HEISLER, N. (1983). Branchial ion exchange and acid-base regulation after strenuous exercise in rainbow trout (*Salmo gairdneri*). *Respir. Physiol.* **51**, 303-318.
- KORMANIK, G. A. & CAMERON, J. N. (1981). Ammonia excretion in animals that breathe water: a review. *Mar. Biol. Letts* **2**, 11-23.
- SMITH, H. W. (1929). The excretion of ammonia and urea by the gills of fish. *J. biol. Chem.* **81**, 727-742.
- SOIVIO, A., WESTMAN, K. & NYHOLM, K. (1972). Improved method of dorsal aorta catheterization: haematological effects followed for three weeks in rainbow trout. *Finn. Fish. Res.* **1**, 11-21.
- SOLORZANO, L. (1969). Determination of ammonia in natural waters by the phenylhypochlorite method. *Limnol. Oceanogr.* **14**, 799-801.
- TOEWS, D. P., HOLETON, G. F. & HEISLER, N. (1983). Regulation of the acid-base status during environmental hypercapnia in the marine teleost fish *Conger conger*. *J. exp. Biol.* **107**, 9-20.
- TURNER, J. D., WOOD, C. M. & HÖBE, H. (1983). Physiological consequences of severe exercise in the inactive benthic flathead sole (*Hippoglossoides elassodon*); a comparison with the active pelagic rainbow trout (*Salmo gairdneri*). *J. exp. Biol.* **104**, 269-288.
- WOOD, C. M., McMAHON, B. R. & McDONALD, D. G. (1977). An analysis of changes in blood pH following exhausting activity in the starry flounder, *Platichthys stellaris*. *J. exp. Biol.* **69**, 173-185.
